# Supplementary material for: A smart sensing triazine hexacarboxylic metal–organic skeleton material: synthesis, structure and multifunctional fluorescence detector
Source: Royal Society of Chemistry journal article supplement (doi:10.1039/d0tc05573e), 2021-01-01
Supplement: d0tc05573e1.pdf [file d0tc05573e1.pdf]

*Electronic Supplementary Information for*

**A smart sensing triazine hexacarboxylic metal-organic  
skeleton material: synthesis, structure and multifunctional  
fluorescence detector**

*Yao Xiao<sup>a</sup>, Bing Li<sup>a</sup>, Zi Xin You<sup>a</sup>, Yong Heng Xing<sup>a\*</sup>, Feng Ying Bai<sup>a\*</sup>, Li-Xian Sun<sup>b</sup>  
and Zhan Shi<sup>c</sup>*

<sup>a</sup> College of Chemistry and Chemical Engineering, Liaoning Normal University,  
Huanghe Road 850#, Dalian 116029, P. R. China.

<sup>b</sup> Guangxi Key Laboratory of Information Materials, Guilin University of Electronic  
Technology, Guilin 541004, P. R. China.

<sup>c</sup> State Key Laboratory of Inorganic Synthesis and Preparative Chemistry, College of  
Chemistry, Jilin University, Changchun 130012, P.R. China.

## Contents

### Materials and methods

**Scheme 1** Synthetic route of ligand H<sub>6</sub>TDPAT.

**Table S1** Single crystal structure data for the complex **1**.

**Table S2** Selected Bond Lengths (Å) for Complex **1**.

**Table S3** IR data of complex **1** and ligand H<sub>6</sub>TDPAT (cm<sup>-1</sup>).

**Table S4** UV-vis spectrum identifications of complex **1** and ligand H<sub>6</sub>TDPAT.

**Table S5** The lifetime of complex **1** in different organic solvents.

**Table S6** The fluorescence quantum yields of complex **1** in different solvents.

**Figure S1** AFM images at different reaction times.

**Figure S2** IR spectra of H<sub>6</sub>TDPAT and complex **1**.

**Figure S3** The UV-vis spectra of H<sub>6</sub>TDPAT and complex **1**.

**Figure S4** PXRD spectra of complex **1**.

**Figure S5** The TG curve of complex **1**.

**Figure S6** Interference experiment of different ions on the detection of Fe<sup>3+</sup> by complex **1**.

**Figure S7** Stern-Volmer fitting linear of MnO<sub>4</sub><sup>-</sup> and Cr<sub>2</sub>O<sub>7</sub><sup>2-</sup>.

**Figure S8** Interference experiment of different ions on the detection of MnO<sub>4</sub><sup>-</sup> and Cr<sub>2</sub>O<sub>7</sub><sup>2-</sup> by complex **1**.

**Figure S9** The S-V fitting plot for complex **1** of detecting MPDA.

**Figure S10** UV-Vis absorption spectrum of complex **1** and the detected substance.

**Figure S11** Fluorescence sensing response and K<sub>sv</sub> values of ligand H<sub>6</sub>TDPAT to different substances.

**Figure S12** The lifetime curve of complex **1**.

**Figure S13** Fluorescence lifetime of complex **1** after adding other detection substances at low concentrations and at high concentrations, respectively.

**Figure S14** The fluorescence lifetime of complex **1** before and after detecting Cr<sub>2</sub>O<sub>7</sub><sup>2-</sup>.

## Materials and Methods.

The ligand H<sub>6</sub>TDPAT was prepared by literature method and appropriately modified the methods [1]. The synthetic route is shown in Scheme 1. All other original chemical reagents and solvents employed in the present work were purchased from commercial sources and used without further purification. The Bruker AXS TENSOR-27 FT-IR spectrometer was applied to record Infrared spectra in the range of 4000-400 cm<sup>-1</sup>. UV-vis absorption spectra of solid sample were received from a JASCO V-570 UV/VIS/NIR spectrophotometer with the range of 200-800 nm, and Lambda 35 spectrometer was applied to record the UV-vis absorption spectra of suspension samples in 200-800 nm. Thermogravimetric data was obtained from a PerkinElmer Diamond TG/DTA under nitrogen protection from room temperature to 1100 °C with the heating rate of 10 °C •min<sup>-1</sup>. X-ray powder diffraction (PXRD) patterns were performed on an Advance D8 equipped with Cu-K $\alpha$  radiation in the range of 5° < 2 $\theta$  < 60°, with a step size of 0.02° (2 $\theta$ ) and a count time of 2 s per step. The HORIBA Fluoromax-4-TCSPC spectrofluorometer which is provided with Pulsed LED sources (200-1000 nm) with 3.2-inch Integrating Sphere was used to measure the fluorescence behavior of the coordination complexes at room temperature. The size and morphology of the material surface was investigated by Scanning Electron Microscope & X-ray Analyzer (SEM, SU8010) and Atomic Force Microscope (AFM, Asylum Research Cypher ES).

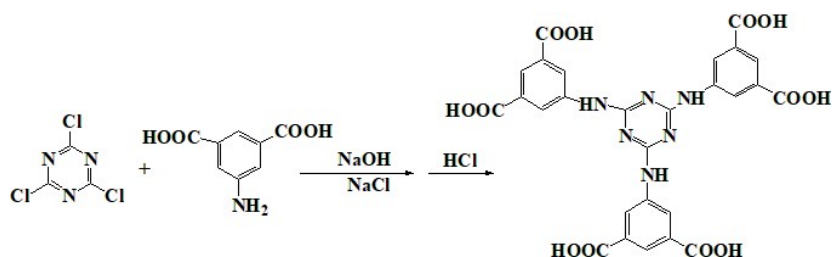

**Scheme 1** Synthetic route of ligand H<sub>6</sub>TDPAT

**Table S1** Single crystal structure data for the complex **1**

| Complex 1                                      | Before squeeze                                                                    | After squeeze                                                                                                                                                       |
|------------------------------------------------|-----------------------------------------------------------------------------------|---------------------------------------------------------------------------------------------------------------------------------------------------------------------|
| Formula                                        | C <sub>54</sub> H <sub>24</sub> N <sub>12</sub> O <sub>25.5</sub> Tb <sub>3</sub> | [(NH <sub>2</sub> (Me) <sub>2</sub> <sup>+</sup> ) <sub>3</sub> ·[Tb <sub>3</sub> (TDPAT) <sub>2</sub> (H <sub>2</sub> O) <sub>1.5</sub> ]·3EtOH·24H <sub>2</sub> O |
| <i>M</i> (g mol <sup>-1</sup> )                | 1725.65                                                                           | 1725.65                                                                                                                                                             |
| crystal system                                 | cubic                                                                             | cubic                                                                                                                                                               |
| space group                                    | <i>I</i> 23                                                                       | <i>I</i> 23                                                                                                                                                         |
| <i>a</i> (Å)                                   | 27.6250(6)                                                                        | 27.6250(6)                                                                                                                                                          |
| <i>b</i> (Å)                                   | 27.6250(6)                                                                        | 27.6250(6)                                                                                                                                                          |
| <i>c</i> (Å)                                   | 27.6250(6)                                                                        | 27.6250(6)                                                                                                                                                          |
| $\alpha$ (deg)                                 | 90                                                                                | 90                                                                                                                                                                  |
| $\beta$ (deg)                                  | 90                                                                                | 90                                                                                                                                                                  |
| $\gamma$ (deg)                                 | 90                                                                                | 90                                                                                                                                                                  |
| <i>V</i> (Å <sup>3</sup> )                     | 21267(2)                                                                          | 21267(2)                                                                                                                                                            |
| <i>Z</i>                                       | 8                                                                                 | 8                                                                                                                                                                   |
| <i>D</i> <sub>calc</sub> (g·cm <sup>-3</sup> ) | 1.551                                                                             | 1.551                                                                                                                                                               |

|                                               |                              |                              |
|-----------------------------------------------|------------------------------|------------------------------|
| $F(000)$                                      | 10008                        | 10008                        |
| $\mu(\text{Mo-K}\alpha)$ ( $\text{mm}^{-1}$ ) | 2.063                        | 2.063                        |
| $\theta$ (deg)                                | 1.04 - 28.07                 | 1.04 - 28.07                 |
| Reflections collected                         | 68160                        | 68160                        |
| independent reflections ( $I > 2\sigma(I)$ )  | 8640                         | 8640                         |
| Parameters                                    | 285                          | 285                          |
| $\Delta(\rho)$ ( $\text{e \AA}^{-3}$ )        | 0.795 and -0.447             | 0.795 and -0.447             |
| goodness of fit on $F^2$                      | 1.017                        | 1.017                        |
| $R^a$                                         | 0.0259 (0.0303) <sup>b</sup> | 0.0259 (0.0303) <sup>b</sup> |
| $wR_2^a$                                      | 0.0614 (0.0625) <sup>b</sup> | 0.0614 (0.0625) <sup>b</sup> |

[a]  $R = \sum |F_o| - |F_c| / \sum |F_o|$ ,  $wR_2 = (\sum (w(F_o^2 - F_c^2)^2) / \sum (w(F_o^2)^2))^{1/2}$ ; [ $F_o > 4\sigma(F_o)$ ]; [b] based on all data

**Table S2** Selected Bond Lengths ( $\text{\AA}$ ) for Complex **1**

| Complex <b>1</b> |          |             |          |
|------------------|----------|-------------|----------|
| Tb(1)-O(1)       | 2.474(3) | Tb(1)-O(1#) | 2.584(3) |
| Tb(1)-O(2)       | 2.462(3) | Tb(1)-O(3)  | 2.273(2) |
| Tb(1)-O(4)       | 2.438(3) | Tb(1)-O(5)  | 2.490(3) |
| Tb(1)-O(6)       | 2.255(3) | Tb(1)-O(8)  | 2.258(3) |

**Table S3** IR data of complex **1** and ligand H<sub>6</sub>TDPAT ( $\text{cm}^{-1}$ )

|                          | Complex    | H <sub>6</sub> TDPAT |
|--------------------------|------------|----------------------|
| $\nu_{(\text{N-H})}$     | 3583       | 3433                 |
| $\nu_{(\text{Ar-H})}$    | 3106       | 3188                 |
| $\nu_{(\text{CH}_2)}$    | 2950, 2856 | 2933, 2845           |
| $\nu_{(\text{C=N})}$     | 1532       | 1528                 |
| $\nu_{(\text{C=C})}$     | 1598       | 1572                 |
| $\nu_{(\text{asCOO-})}$  | 1707       | 1623                 |
| $\nu_{(\text{sCOO-})}$   | 1412       | 1378                 |
| $\nu_{(\text{C-N})}$     | 1187       | 1115                 |
| $\nu_{(\text{C-O})}$     | 1077       | 1026                 |
| $\delta_{(\text{Ar-H})}$ | 933, 774   | 904, 798             |
| $\nu_{(\text{Ln-O})}$    | -          | 614                  |

**Table S4** UV-vis spectrum identifications of complex **1** and ligand H<sub>6</sub>TDPAT

| Complex              | Wavelength(nm) | Transition  | Types |
|----------------------|----------------|-------------|-------|
| H <sub>6</sub> TDPAT | 217, 265       | $\pi-\pi^*$ |       |
|                      | 347            | $n-\pi^*$   |       |
| <b>1</b>             | 267            | $\pi-\pi^*$ | LLCT  |
|                      | 330            | $n-\pi^*$   | LLCT  |
|                      | 463            | O-Tb        | LMCT  |

**Table S5** The lifetime of complex **1** in different organic solvents

| Solvents                        | Lifetime (s)                    | Average Lifetime (s)       |
|---------------------------------|---------------------------------|----------------------------|
| Complex <b>1</b>                | $\tau_1=2.042871\times 10^{-5}$ | $T=8.489039\times 10^{-4}$ |
|                                 | $\tau_2=3.485968\times 10^{-6}$ |                            |
| DMA                             | $\tau_1=1.825785\times 10^{-6}$ | $T=1.07975\times 10^{-3}$  |
|                                 | $\tau_2=2.064967\times 10^{-6}$ |                            |
| DMF                             | $\tau_1=1.802947\times 10^{-6}$ | $T=1.085945\times 10^{-3}$ |
|                                 | $\tau_2=2.052005\times 10^{-6}$ |                            |
| CH <sub>2</sub> Cl <sub>2</sub> | $\tau_1=1.69563\times 10^{-6}$  | $T=9.987784\times 10^{-4}$ |
|                                 | $\tau_2=1.624757\times 10^{-6}$ |                            |
| MeOH                            | $\tau_1=1.699469\times 10^{-6}$ | $T=1.022173\times 10^{-3}$ |
|                                 | $\tau_2=1.761614\times 10^{-6}$ |                            |
| EtOH                            | $\tau_1=1.691361\times 10^{-6}$ | $T=1.080233\times 10^{-3}$ |
|                                 | $\tau_2=1.911976\times 10^{-6}$ |                            |
| MeCN                            | $\tau_1=1.810699\times 10^{-6}$ | $T=1.099839\times 10^{-3}$ |
|                                 | $\tau_2=2.052299\times 10^{-6}$ |                            |
| EA                              | $\tau_1=9.50361\times 10^{-7}$  | $T=1.014549\times 10^{-3}$ |
| N-hexane                        | $\tau_1=1.648482\times 10^{-6}$ | $T=1.03164\times 10^{-3}$  |
|                                 | $\tau_2=1.746223\times 10^{-6}$ |                            |
| H <sub>2</sub> O                | $\tau_1=2.625532\times 10^{-6}$ | $T=7.427649\times 10^{-4}$ |
|                                 | $\tau_2=1.136978\times 10^{-6}$ |                            |

**Table S6** The fluorescence quantum yields of complex **1** in different organic solvents

| Solvents                        | Quantum yields |
|---------------------------------|----------------|
| DMA                             | 43.54          |
| DMF                             | 43.45          |
| CH <sub>2</sub> Cl <sub>2</sub> | 40.05          |
| MeOH                            | 55.76          |
| EtOH                            | 44.55          |
| MeCN                            | 54.61          |
| EA                              | 50.49          |
| N-hexane                        | 39.81          |
| H <sub>2</sub> O                | 40.88          |

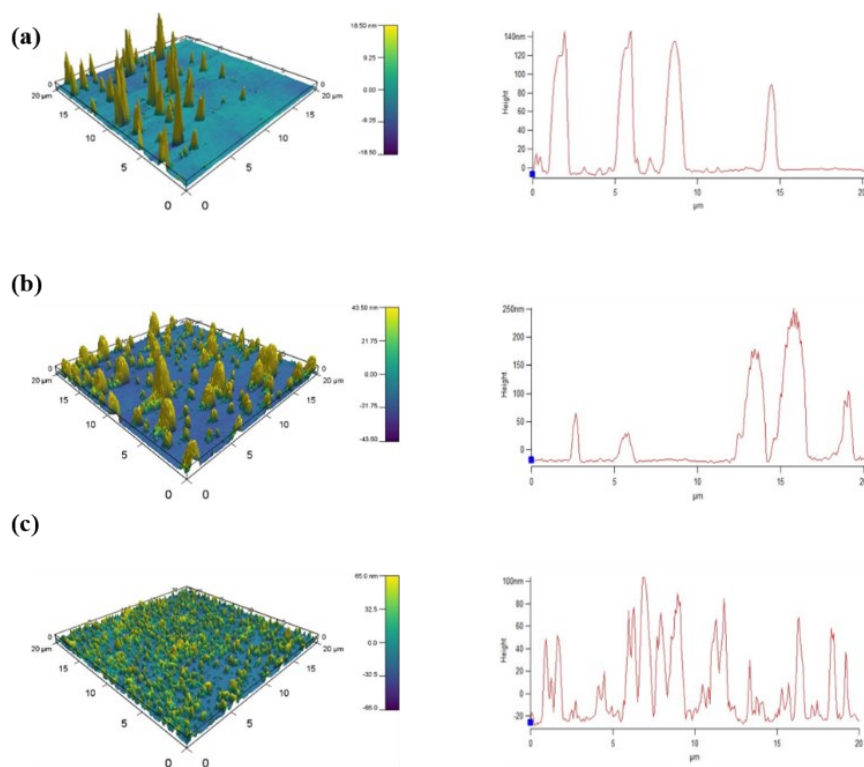

**Figure S1** AFM images at different reaction times : (a) before the reaction; (b) during the reaction;(c) after the reaction

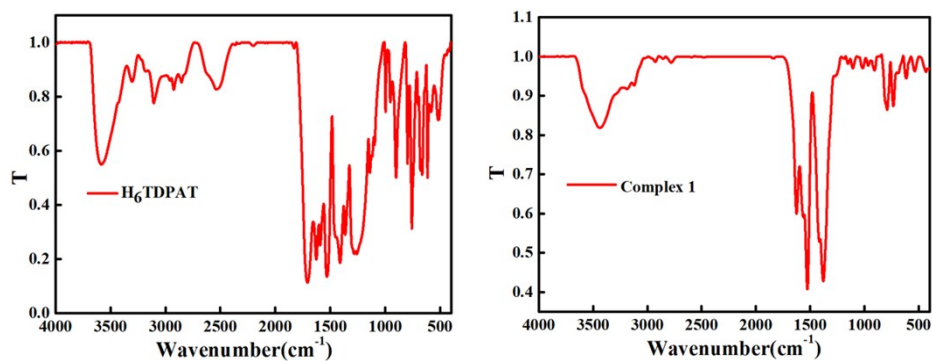

**Figure S2** IR spectra of H<sub>6</sub>TDPAT and complex 1

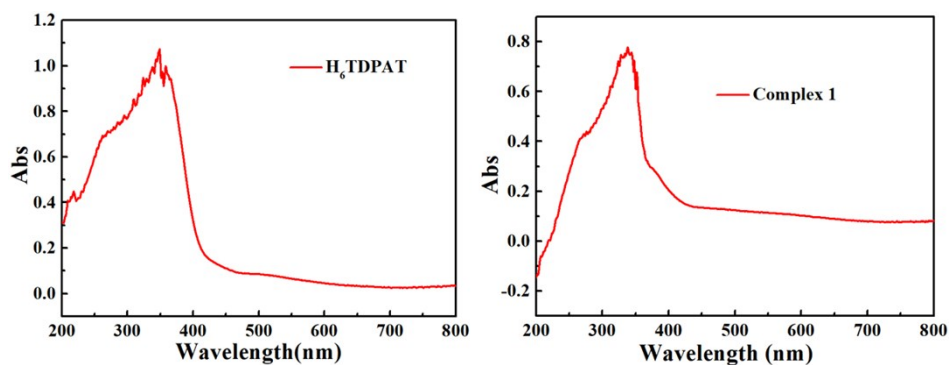

**Figure S3** The UV-vis spectra of H<sub>6</sub>TDPAT and complex 1

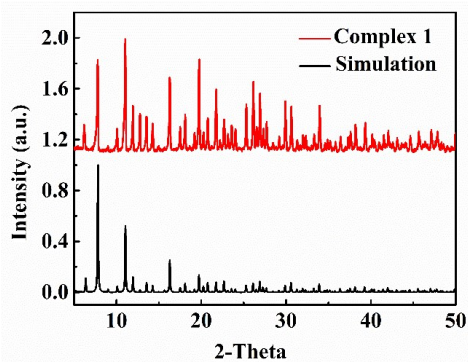

**Figure S4** PXRD spectra of complex 1

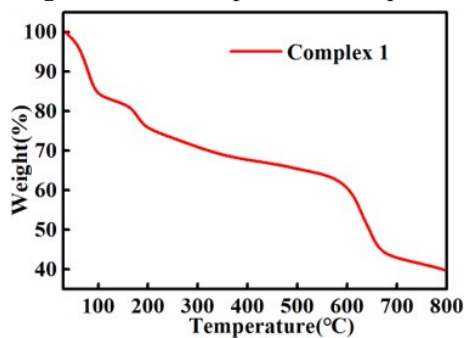

**Figure S5** The TG curve of complex 1

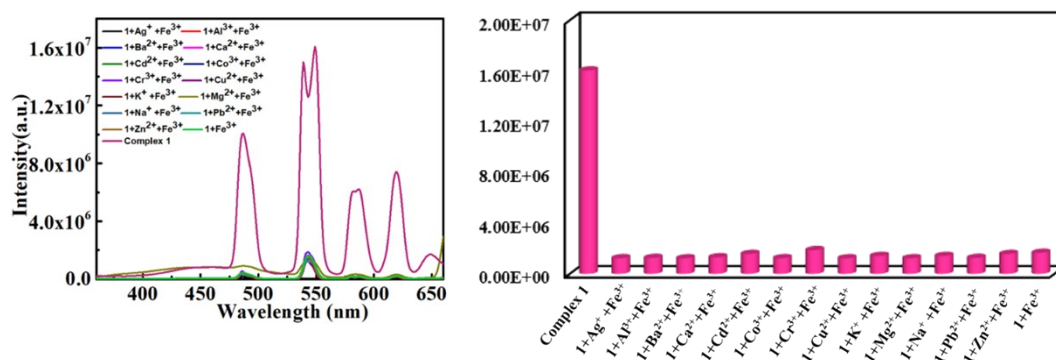

**Figure S6** (a) The change of fluorescent spectra of the complex **1** interacting with different metal ions with and without  $\text{Fe}^{3+}$  ions (b) The change of fluorescent spectra at 543 nm of the complex **1** interacting with different metal ions with and without  $\text{Fe}^{3+}$  ions.

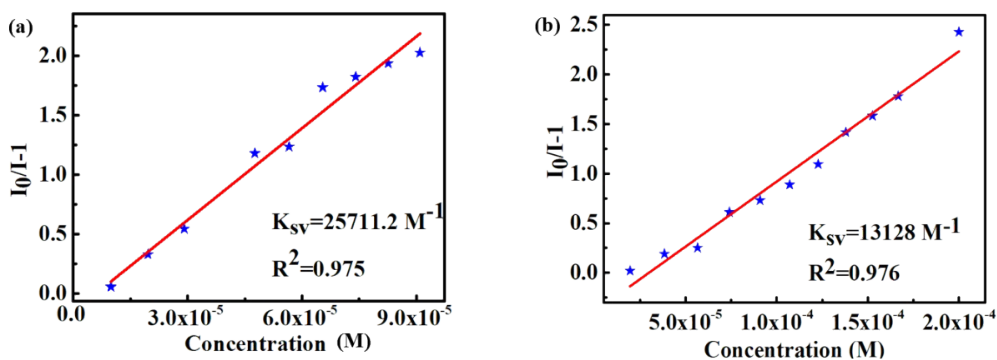

**Figure S7** Stern-Volmer fitting linear plot of (a)  $\text{MnO}_4^-$  ( $10^{-3}$  mol/L) detected by complex **1**; (b) Stern-Volmer fitting linear plot of  $\text{Cr}_2\text{O}_7^{2-}$  ( $10^{-3}$  mol/L) detected by complex **1**

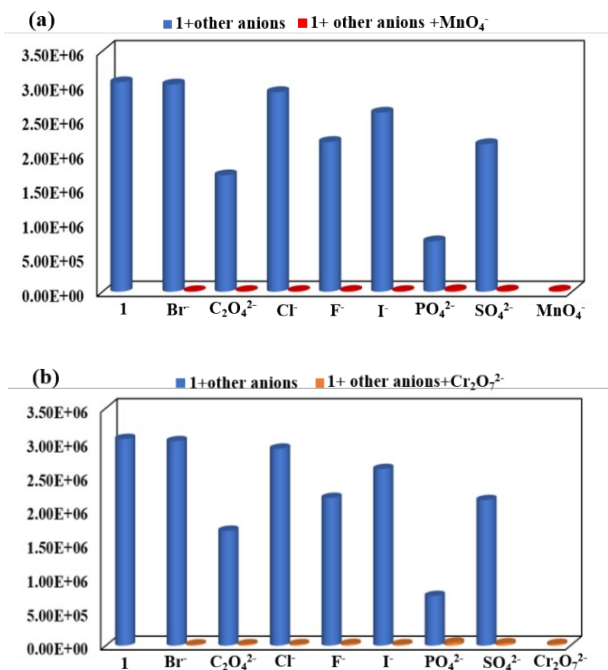

**Figure S8** The change of luminescence intensities of complex **1** at 543 nm upon addition of anions: (a)  $\text{Cr}_2\text{O}_7^{2-}$ , (b)  $\text{MnO}_4^-$



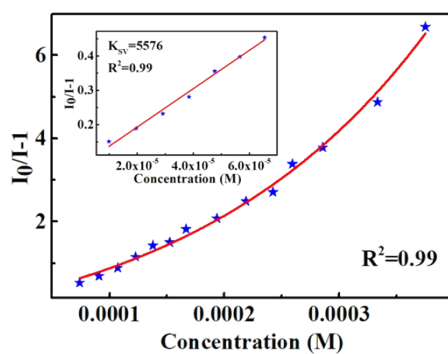

Figure S9 The S-V fitting plot for complex 1 of detecting MPDA

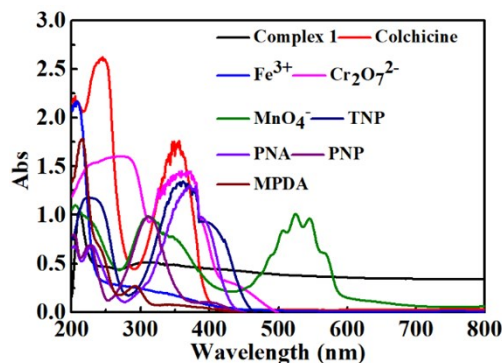

Figure S10 UV-Vis absorption spectrum of complex 1 and the detected substance

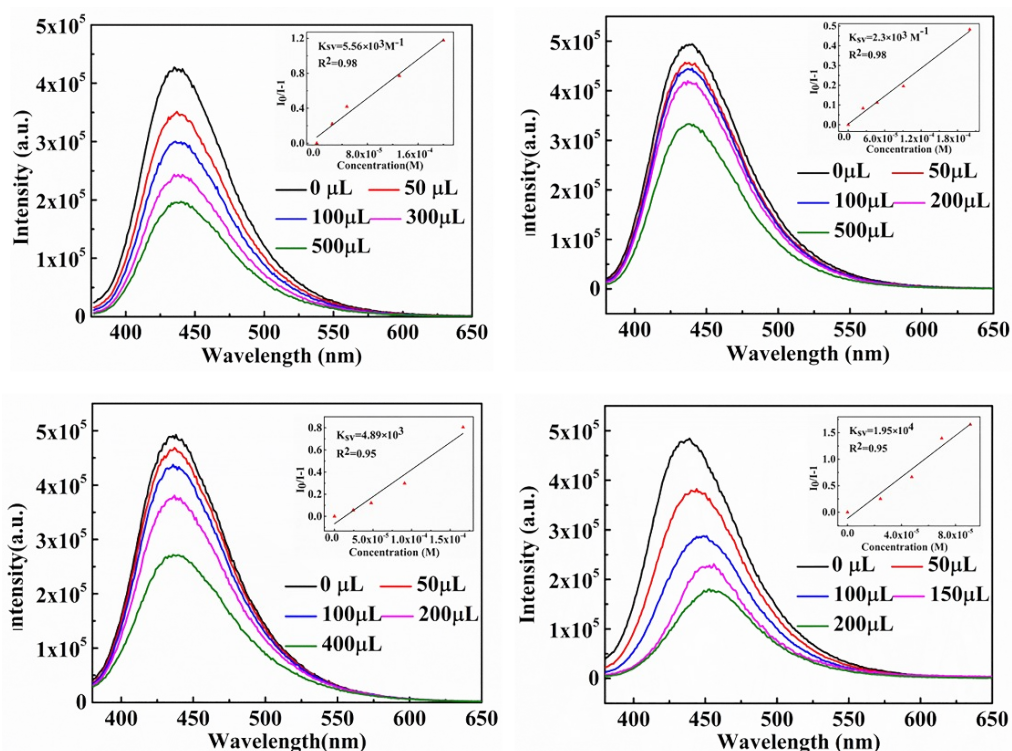

Figure S11 Fluorescence sensing response and  $K_{sv}$  values of ligand  $\text{H}_6\text{TDPAT}$  to different substances: (a) Colchicine (b)  $\text{Fe}^{3+}$  (c)  $\text{MnO}_4^-$  (d) TNP

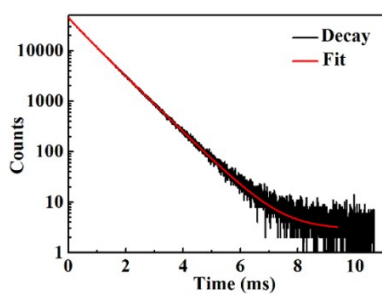

**Figure S12** The lifetime curve of complex 1

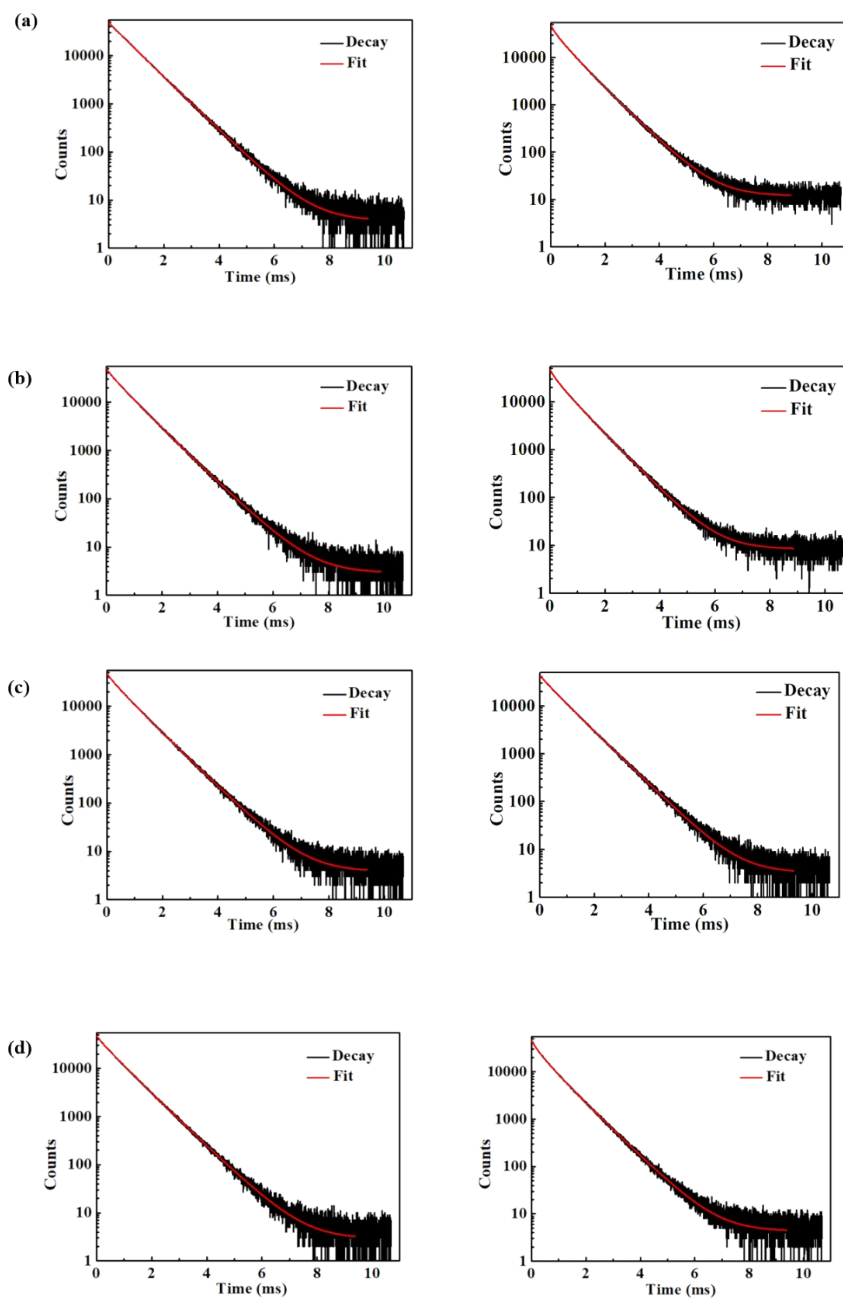

**Figure S13** Fluorescence lifetimes of complex 1 after adding other detection substances at low concentrations and at high concentrations, respectively: (a) colchicine, (b)  $\text{Fe}^{3+}$ , (c) TNP and (d) MPDA

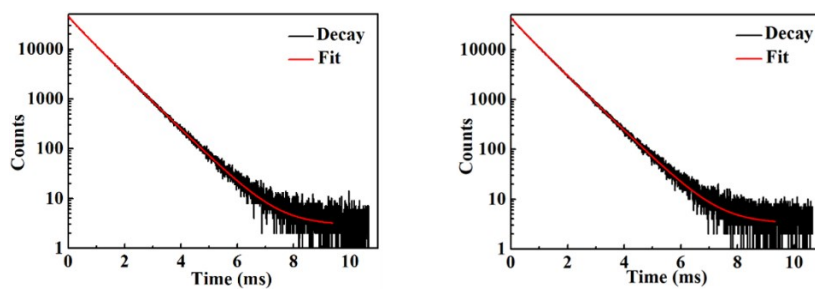

**Figure S14** The fluorescence lifetime of complex **1** before and after detecting  $\text{Cr}_2\text{O}_7^{2-}$

#### References

- [1] B Li, Z J Zhang, Y Li, K X Yao, Y H Zhu, Z Y Deng, F Yang, X J Zhou, G H Li, H H Wu, N Nijem, Y J Chabal, Z P Lai, Y Han, Shi Z, S H Feng and J Li, *Angew Chem Int Ed Engl*, 2012, 124(6):1441-1444.
